# Supplementary material for: Inhibition of α-Synuclein Fibrillization by Dopamine Is Mediated by Interactions with Five C-Terminal Residues and with E83 in the NAC Region
Source: PubMed Central journal article supplement (PMC2566601; doi:10.1371/journal.pone.0003394), 2008-10-14
Supplement: pone.0003394.s002.pdf [file pone.0003394.s002.pdf]

## Cluster 1

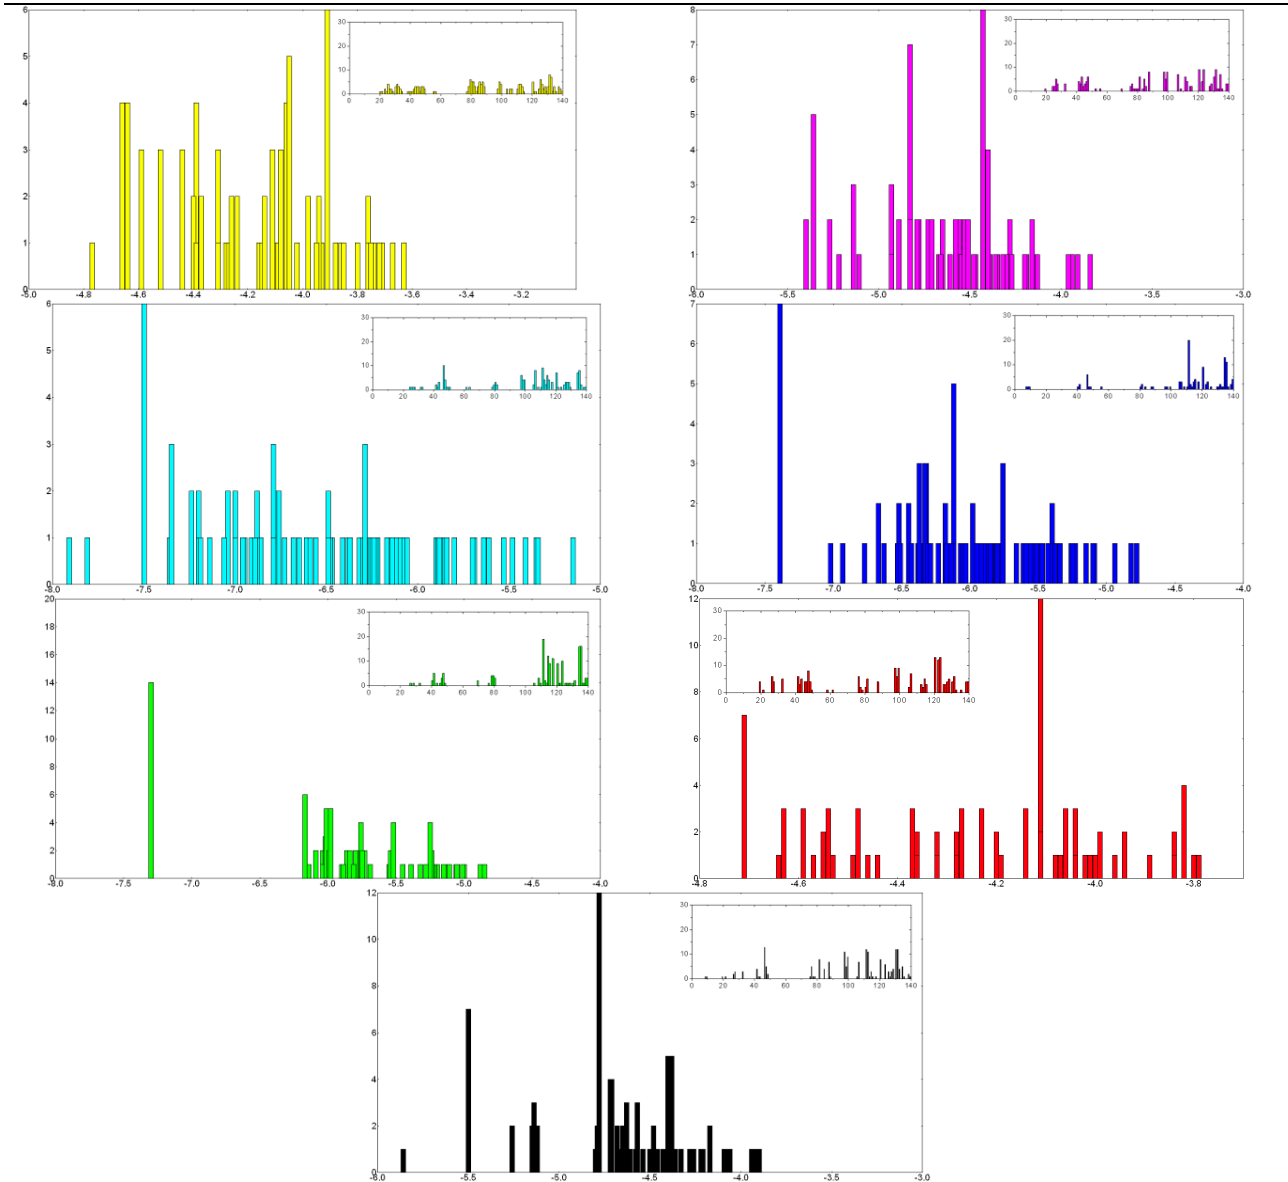

## Cluster 2

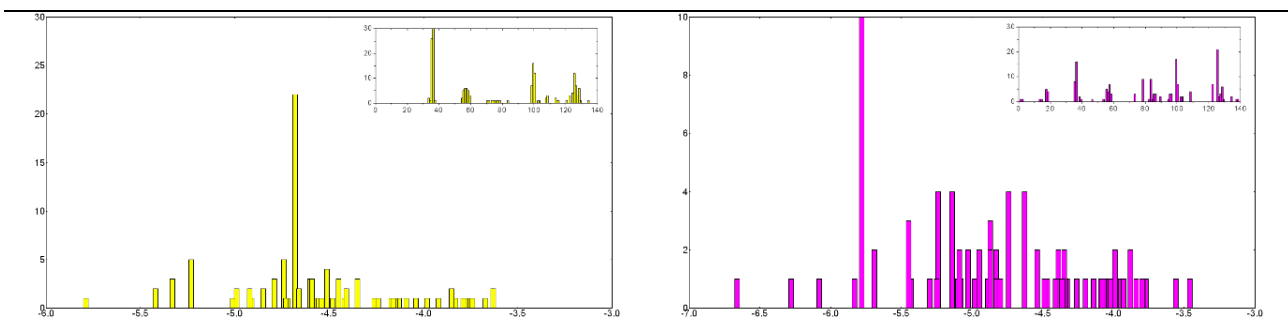

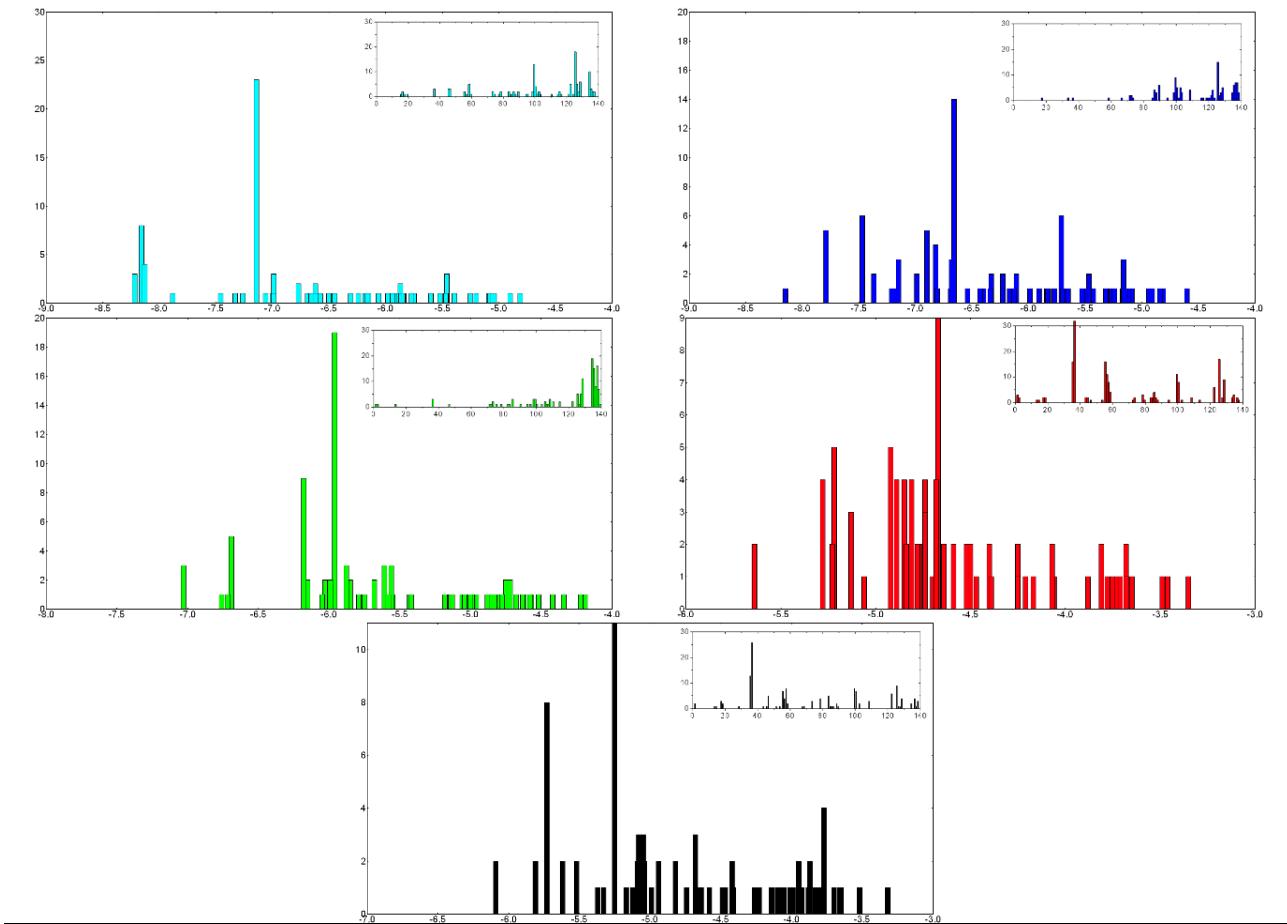

Cluster 3

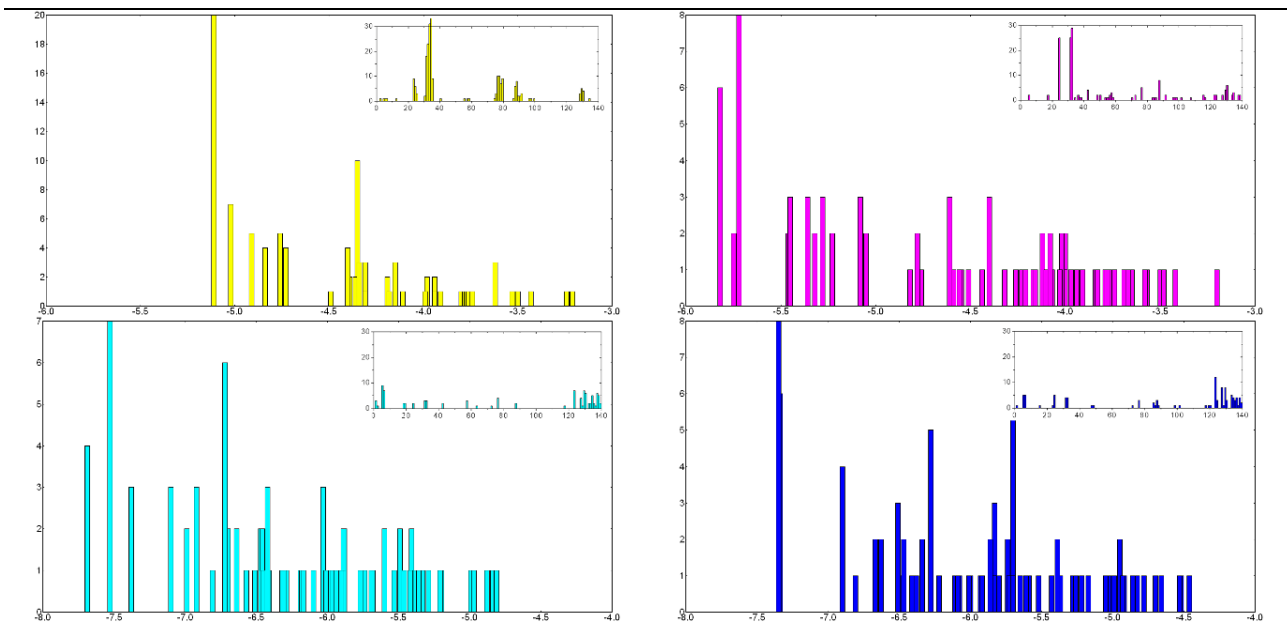

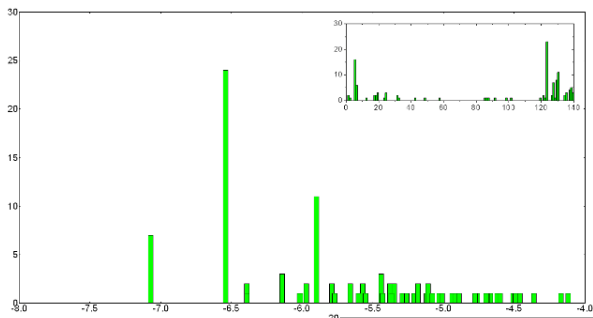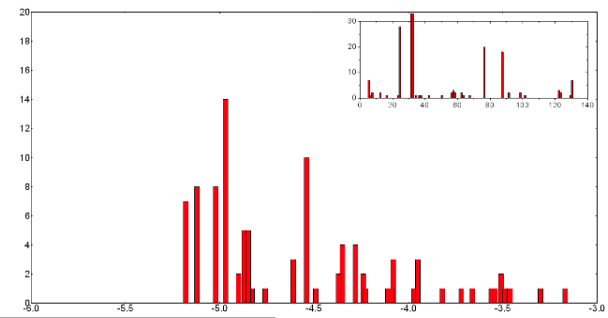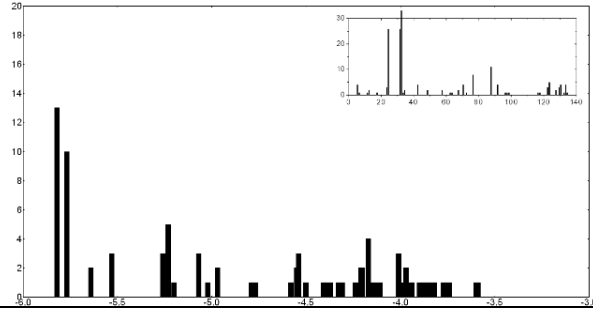

### Cluster 4

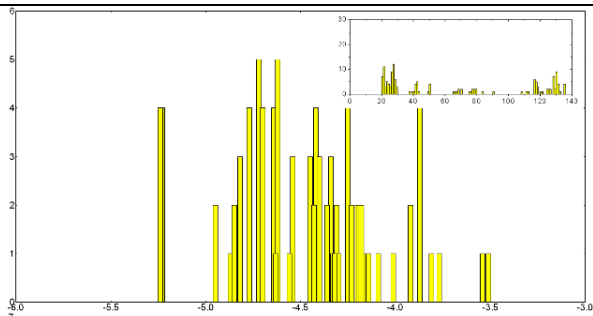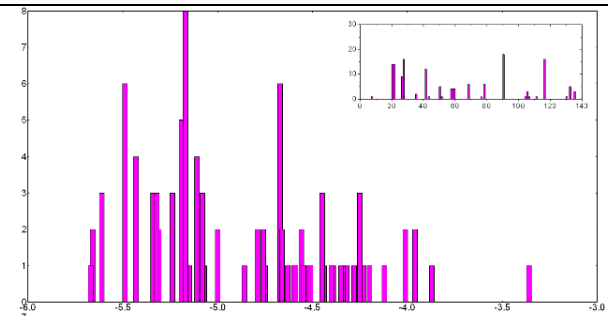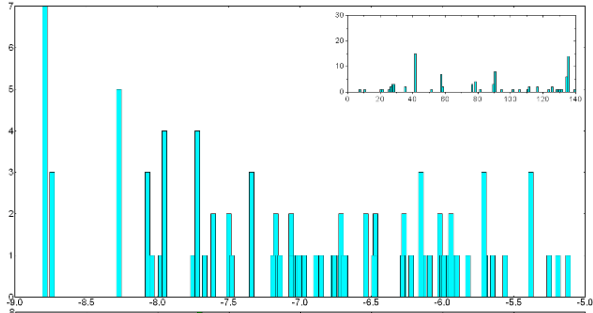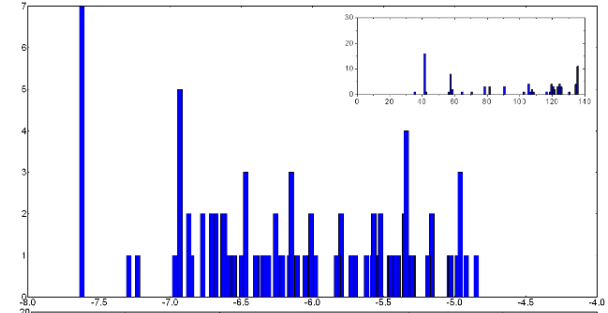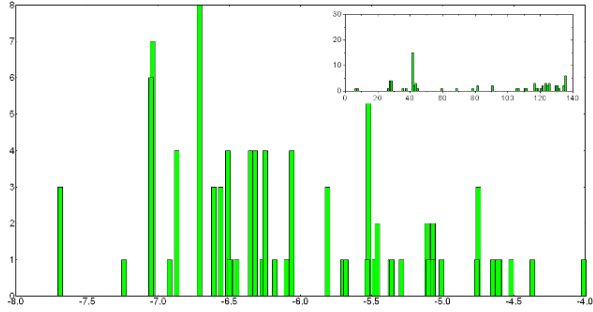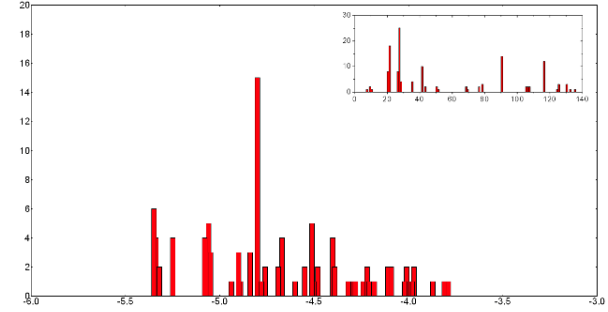

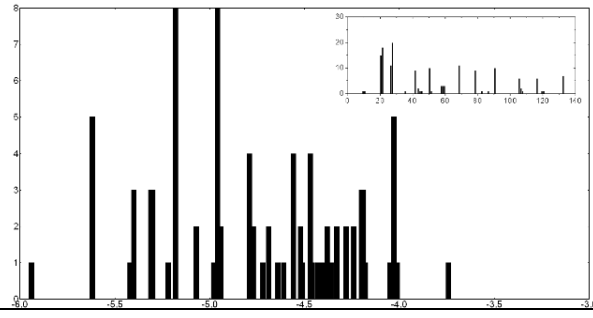

Cluster 5

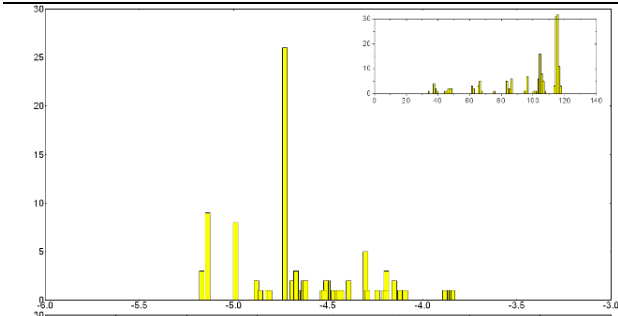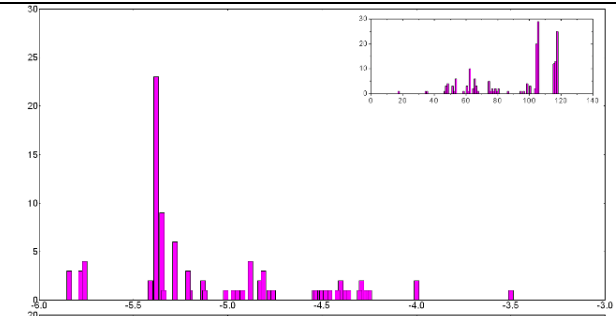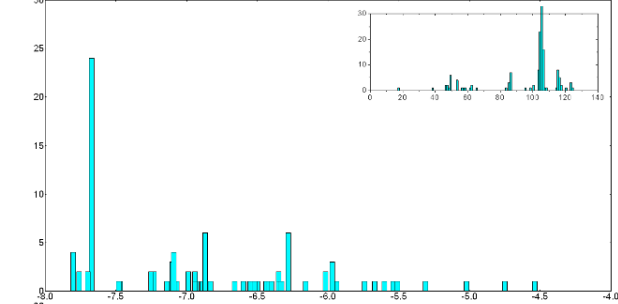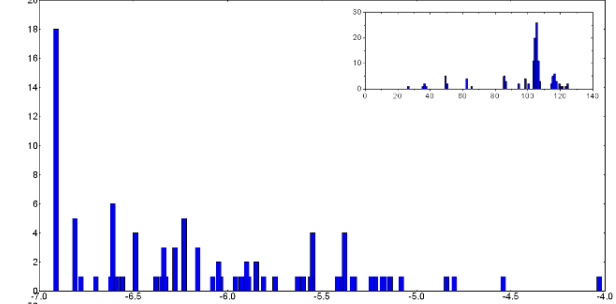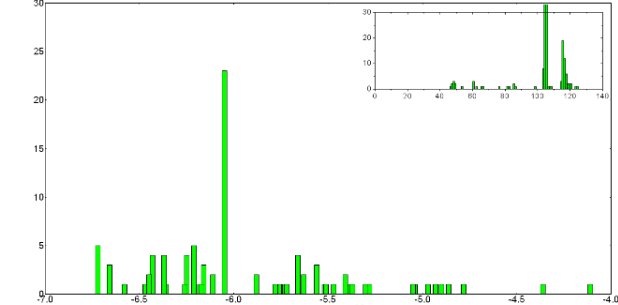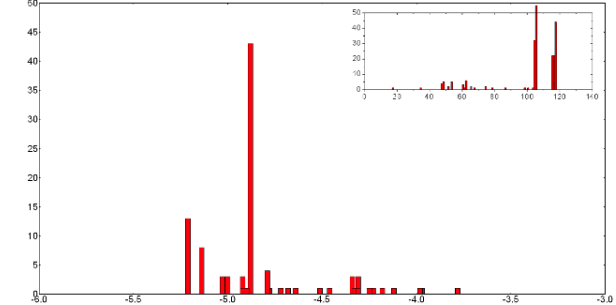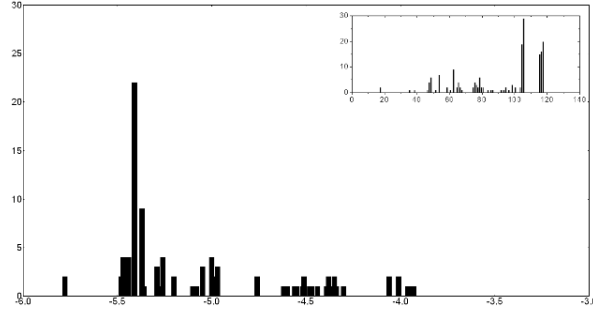

## Cluster 6

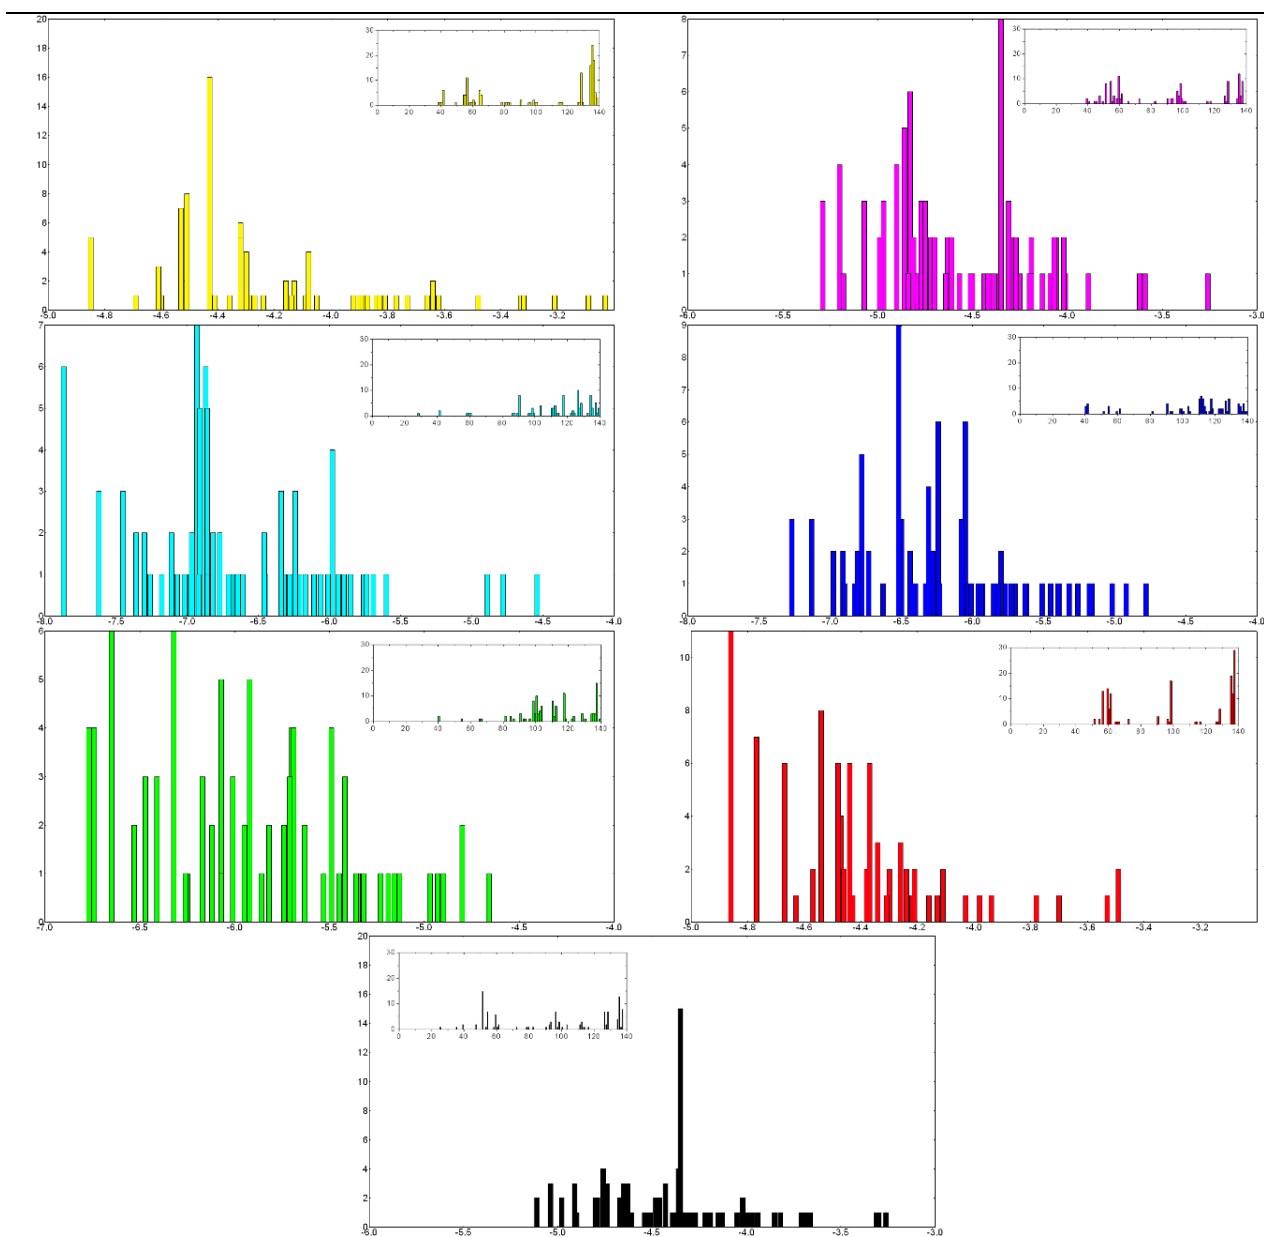

**Figure S2. Molecular docking:** Results for the 100 runs for each of the 6 AS representatives conformations with DCH (yellow), DHI (pink), DOP (light blue), DOP-H (blue), DQ (green), IQ (red) and LEUK (black) (54 complexes). Clustering of the docking results, as implemented in AUTODOCK, plotted as a function of the AUTODOCK scoring function (in Kcal/mol). Inset: The number of hits (defined in Tab. 2SI) between AS and the respective ligand.
