# Supplementary material for: Inhibition of α-Synuclein Fibrillization by Dopamine Is Mediated by Interactions with Five C-Terminal Residues and with E83 in the NAC Region
Source: PubMed Central journal article supplement (PMC2566601; doi:10.1371/journal.pone.0003394), 2008-10-14
Supplement: pone.0003394.s005.pdf [file pone.0003394.s005.pdf]

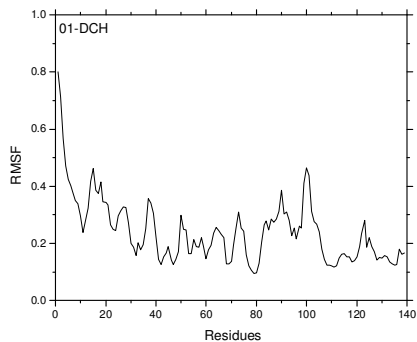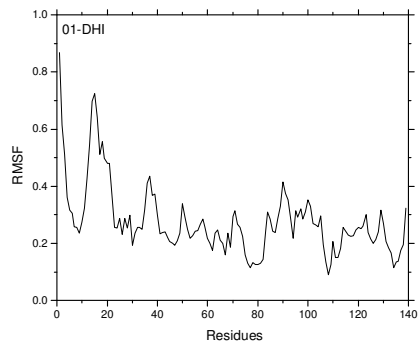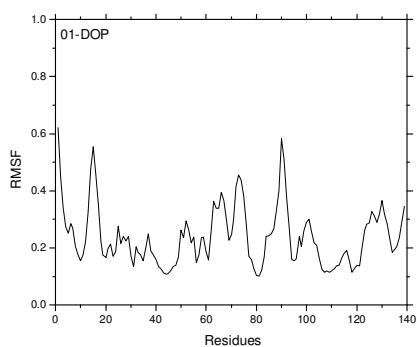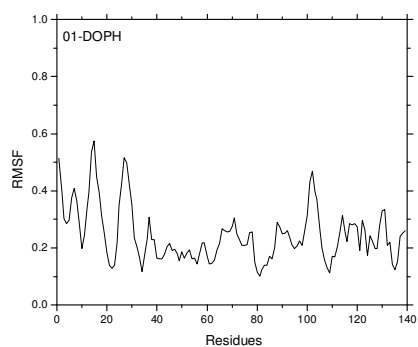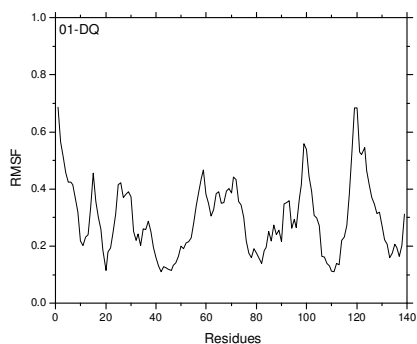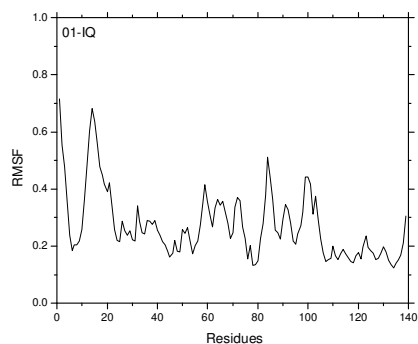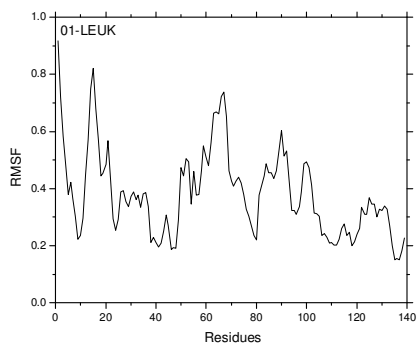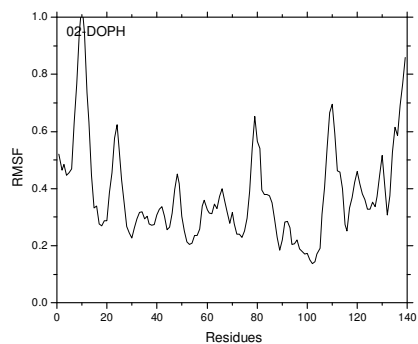

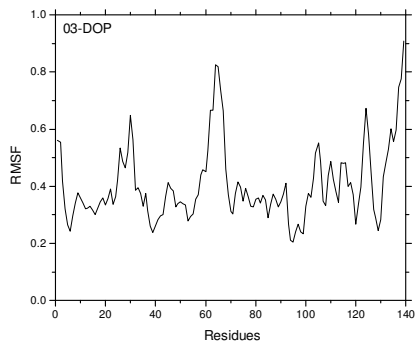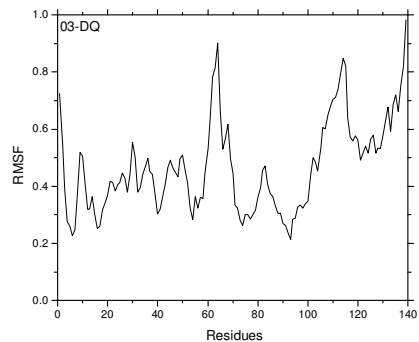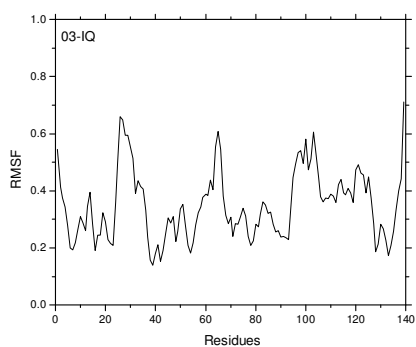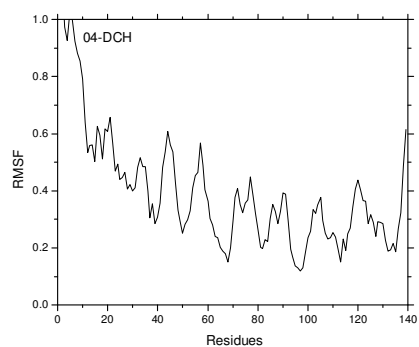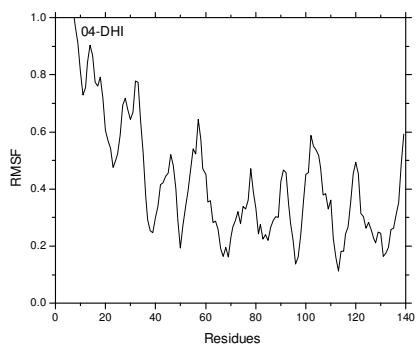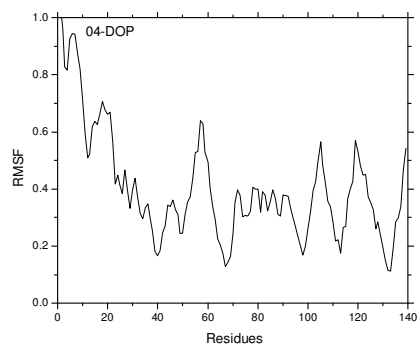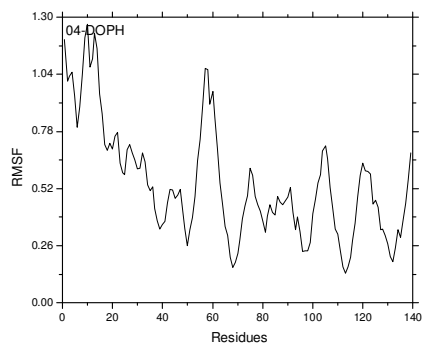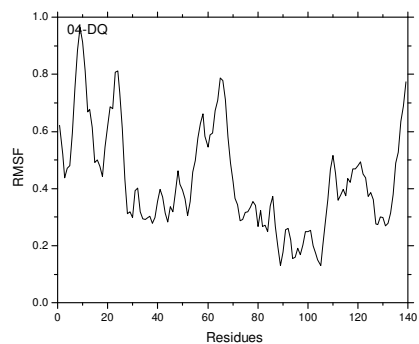

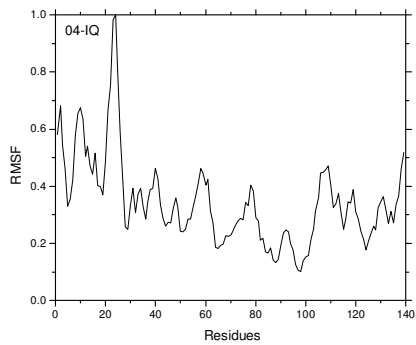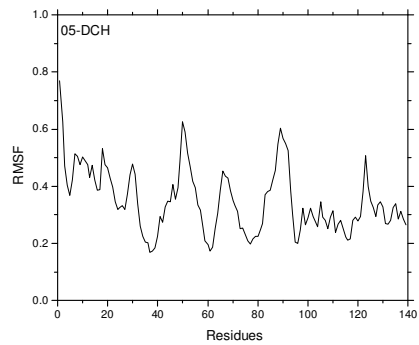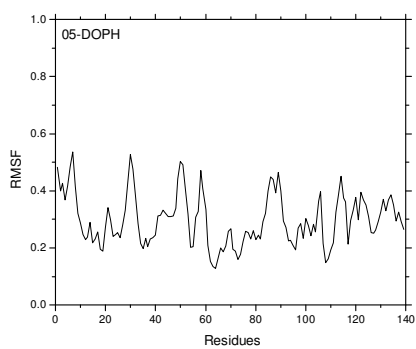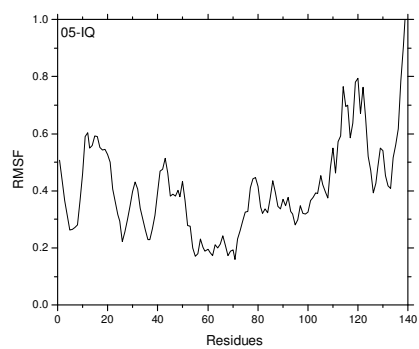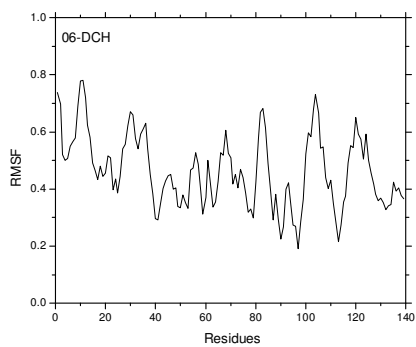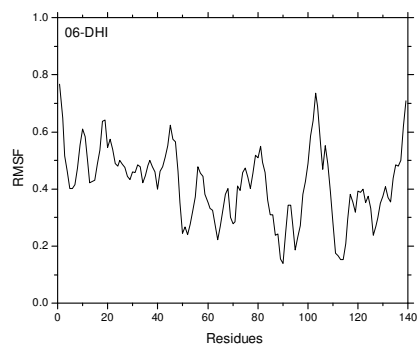

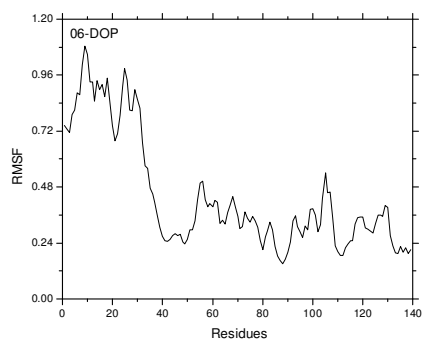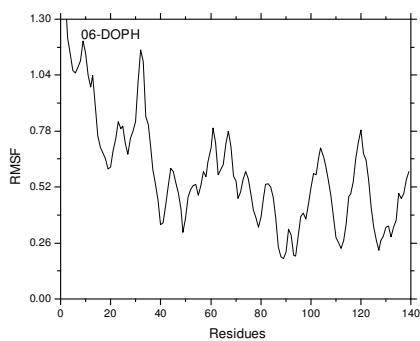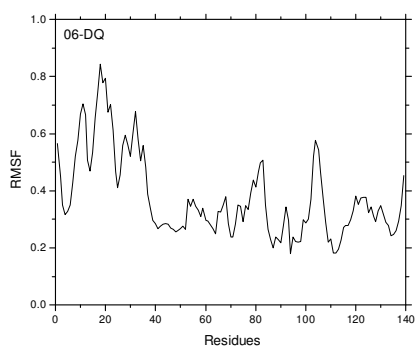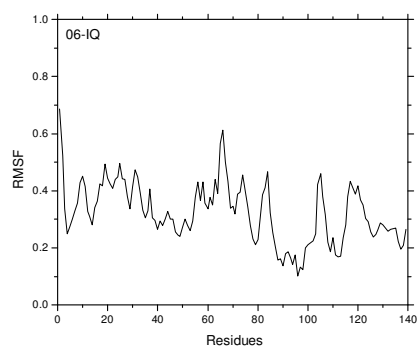

**Figure S5. Structural fluctuations.** Molecular dynamics of the NMR-derived conformations with the ligands. The Root mean square fluctuations (RMSF's, in Å) are reported for the 26 stable complexes.
