# Supplementary material for: Inhibition of α-Synuclein Fibrillization by Dopamine Is Mediated by Interactions with Five C-Terminal Residues and with E83 in the NAC Region
Source: PubMed Central journal article supplement (PMC2566601; doi:10.1371/journal.pone.0003394), 2008-10-14
Supplement: pone.0003394.s009.pdf [file pone.0003394.s009.pdf]

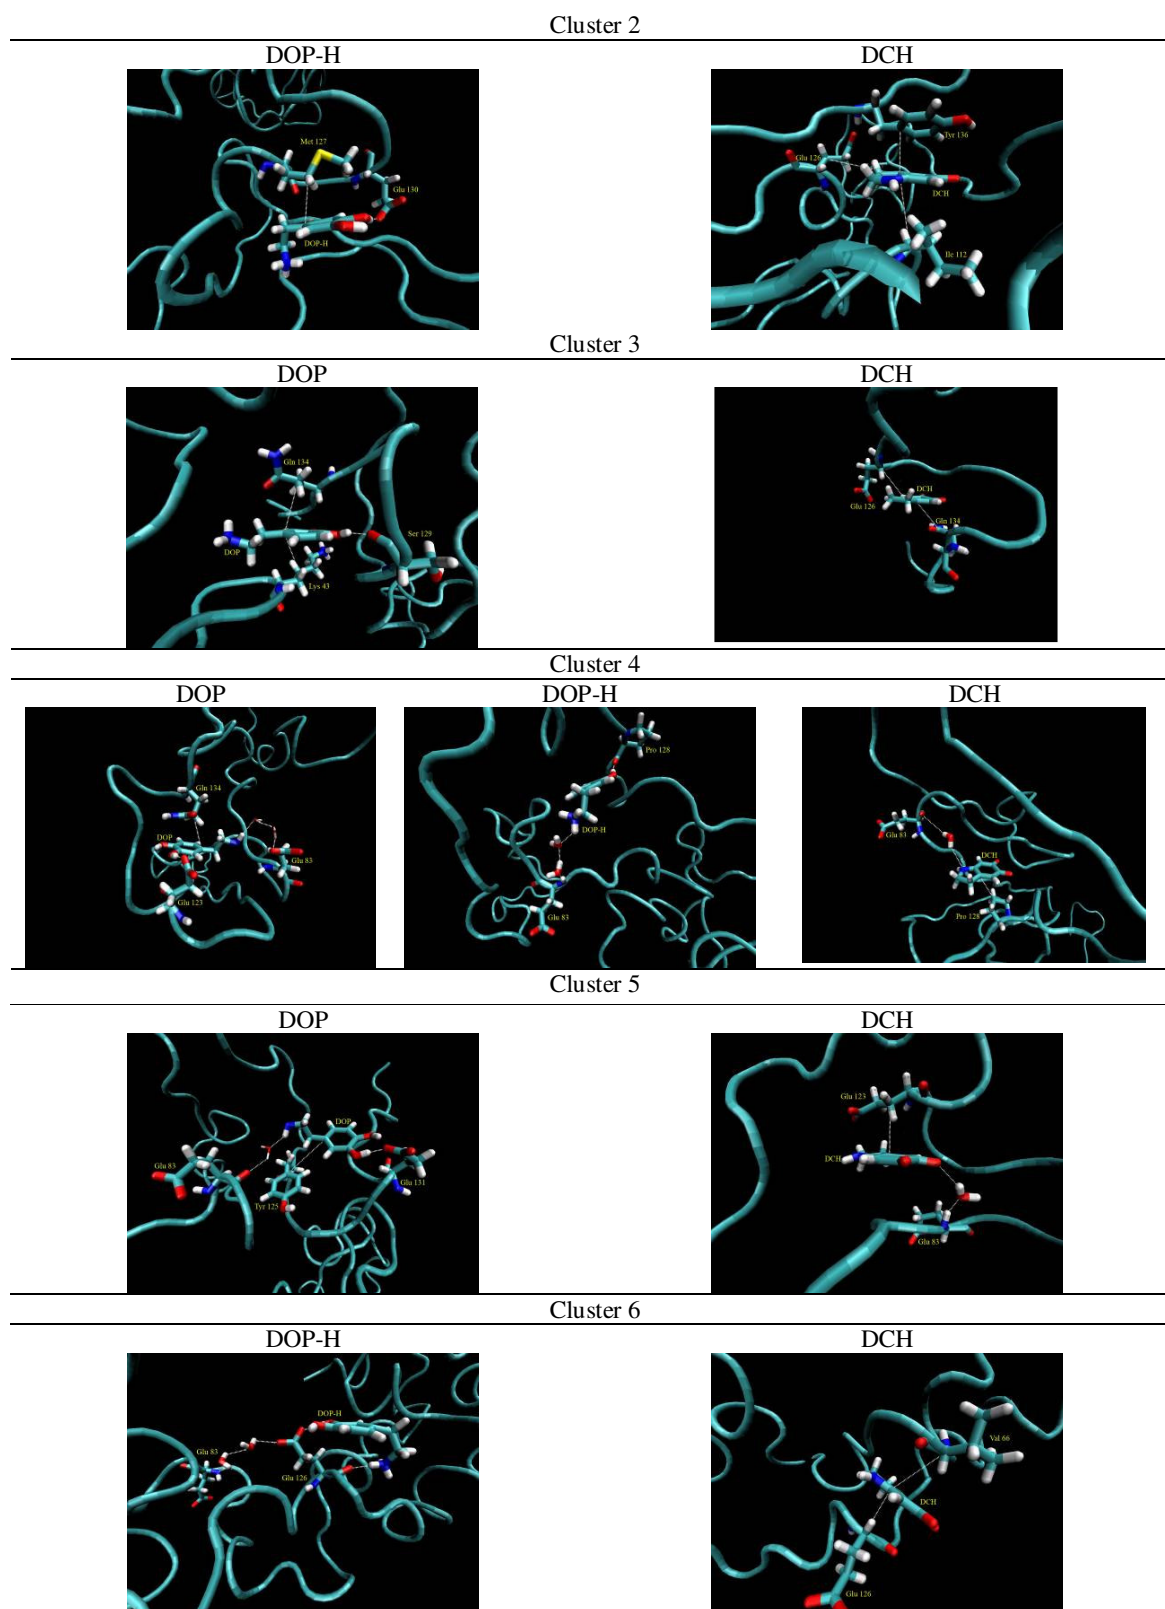

**Figure S9.** MD simulations in the “stable” complexes from the second cluster analysis. The ligands and the residues involved in the interactions are shown in sticks. Hydrogen bonding and hydrophobic interactions are shown as dashed lines. Snapshots taken from the last frame of the MD simulations.
